# Supplementary material
Source: PubMed Central journal article supplement (PMC3440209)
Supplement: supp_pp.112.196733_196733Supplemantal_data_rev2.pdf [file supp_pp.112.196733_196733Supplemantal_data_rev2.pdf]

```

Os04g0565200 1 MAAKGNPAVAIVAVVPPFAQGHNLQLLHLSLQLASSSHGIDVHYAAPAHRLQARARVHGWDR---ALLSQCFDHLDGHS-TIVSPPDPDTADFPFSLHMPDWEATADARAPISALLDE
Os04g0565400 1 MAEKGNPANKVAIVAVVPPFAQGHNLQLLHLSLQLASSSHGIDVHYAAPAHRLQARARVHGWDR---ALLSQCFDHLDGHS-TIVSPPDPDTADFPFSLHMPDWEATADARAPISALLDE
Os04g0565600 1 -----MEFVAVVAVPPFAQGHNLQLLHLSLQLASSR-GGNDVHYAAPAHRLQARARVHGWDR---ALLSQCFDHLDGHS-TIVSPPDPDTADFPFSLHMPDWEATADARAPISALLDE
Os04g0565500 1 --MATGTVESVAVVAVPPFAQGHNLQLLHLSLQLASSR-GIDVHYAAPAHRLQARARVHGWDR---ALLSQCFDHLDGHS-TIVSPPDPDTADFPFSLHMPDWEATADARAPISALLDE
Os04g0565600 1 --MATGTVESVAVVAVPPFAQGHNLQLLHLSLQLASSR-GIDVHYAAPAHRLQARARVHGWDR---ALLSQCFDHLDGHS-TIVSPPDPDTADFPFSLHMPDWEATADARAPISALLDE
Os07g0660500 1 --MEDSAAAAVAIVAVVPPFAQGHNLQLLHLSLQLASSR-GIDVHYAAPAHRLQARARVHGWDAGAGALRLAAVRFRAIDFEGSASPPDPDSE--FFGHMMPLEAFCDARPLAALLRE
Maize_cisZOG1 1 --MAMDIMESVAVVAVPPFAQGHNLQLLHLSLQLASSR-GISVHYAAPPHRLQARARVHGWDR---ALLSQCFDHLDGHS-TIVSPPDPDTADFPFSLHMPDWEATADARAPISALLDE
Maize_cisZOG2 1 --MAMDIMESVAVVAVPPFAQGHNLQLLHLSLQLASSR-GISVHYAAPPHRLQARARVHGWDR---ALLSQCFDHLDGHS-TIVSPPDPDTADFPFSLHMPDWEATADARAPISALLDE

Os04g0565200 119 LSASVRRVVVVDRLNLSFAAQAARLNGEAFVQCVAVMSATSGIDPG--HRLRENGLREHLEMTYTKKEFDYEQQARAAQSISSCAGILANACRALEGEFIDVGRERLDASSRKLFA
Os04g0565400 119 LSASVRRVVVVDRLNLSFAAQAARLNGEAFVQCVAVMSALALHETG--HRLRENGLREHLEMTYTKKEFDYEQQARAAQSISSCAGILANACRALEGEFIDVGRERLDASSRKLFA
Os04g0565600 111 LSASVRRVVVVDRLNLSFAAQAARLNGEAFVQCVAVMSALARRAPQEHQRLRENGLREHLEMTYTKKEFDYEQQARAAQSISSCAGILANACRALEGEFIDVGRERLDASSRKLFA
Os04g0565500 114 LSASVRRVVVVDRLNLSFAAQAARLNGEAFGLQCVAVMSYINIGWLDPE--HRLRBEHGLRREHACMTKEFVFLS-RAGQDENASSGILMNTSRALEGEFIDVGRERLDASSRKLFA
Os04g0565600 114 LSASVRRVVVVDRLNLSFAAQAARLNGEAFGLQCVAVMSYINIGWLDPE--HRLRBEHGLRREHACMTKEFVFLS-RAGQDENASSGILMNTSRALEGEFIDVGRERLDASSRKLFA
Os07g0660500 118 LSASVRRVVVVDRLNLSFAAQAARLNGEAFGLQCVAVMSYINIGWLDPE--HRLRBEHGLRREHACMTKEFVFLS-RAGQDENASSGILMNTSRALEGEFIDVGRERLDASSRKLFA
Maize_cisZOG1 115 LSASVRRVVVVDRLNLSFAAQAARLNGEAFGLQCVAVMSYINIGWLDPE--HRLRBEHGLRREHACMTKEFVFLS-RAGQDENASSGILMNTSRALEGEFIDVGRERLDASSRKLFA
Maize_cisZOG2 115 LSASVRRVVVVDRLNLSFAAQAARLNGEAFGLQCVAVMSYINIGWLDPE--HRLRBEHGLRREHACMTKEFVFLS-RAGQDENASSGILMNTSRALEGEFIDVGRERLDASSRKLFA

Glycosyltransferase domain (cl10013)

Os04g0565200 239 VGPLNE-LLDLDTGALKQC---RRRHECLDWLDRQPPESVLYVSGFTTSSLRQVAVELAAALGSKQRFIWWLRDADRADIAG---SGESRRAKLLSEFRTETEG-VGLVITGWAPOLE
Os04g0565400 239 VGPLNE-LLINTGSSSEQC---RRRHECLDWLDRQPPESVLYVSGFTTSSLRQVAVELAAALGSKQRFIWWLRDADRADIAG---SGESRRAKLLSEFRTETEG-VGLVITGWAPOLE
Os04g0565600 232 VGPLNE-LLIDTNTSKQCQD---RRRHECLDWLDRQPPESVLYVSGFTTSSLRQVAVELAAALGSKQRFIWWLRDADRADIAG---SGESRRAKLLSEFRTETEG-VGLVITGWAPOLE
Os04g0565500 233 VGPLNE-LLDATARTFPC---QTRHECLDWLDRQPPESVLYVSGFTTSSLRQVAVELAAALGSKQRFIWWLRDADRADIAG---SGESRRAKLLSEFRTETEG-VGLVITGWAPOLE
Os04g0565600 233 VGPLNE-LLDATARTFPC---QTRHECLDWLDRQPPESVLYVSGFTTSSLRQVAVELAAALGSKQRFIWWLRDADRADIAG---SGESRRAKLLSEFRTETEG-VGLVITGWAPOLE
Os07g0660500 237 VGPLNE-LDTRFRAGSFEESA---RRRHECLDWLDRQPPESVLYVSGFTTSSLRQVAVELAAALGSKQRFIWWLRDADRADIAG---SGESRRAKLLSEFRTETEG-VGLVITGWAPOLE
Maize_cisZOG1 234 VGPLNE-LLDADARTFPPG---QARHECLDWLDRQPPESVLYVSGFTTSSLRQVAVELAAALGSKQRFIWWLRDADRADIAG---SGESRRAKLLSEFRTETEG-VGLVITGWAPOLE
Maize_cisZOG2 234 VGPLNE-LLDADARTFAP---RHECLDWLDRQPPESVLYVSGFTTSSLRQVAVELAAALGSKQRFIWWLRDADRADIAG---SGESRRAKLLSEFRTETEG-VGLVITGWAPOLE

Os04g0565200 346 ILAHGATAAFMSHCGWNSMTMESLSHGKPI LAWPMHSDQPWDAELVCKYKAGLLVPRWEKHGEVVPATIQAVIERMMASDGLAVRQRAKALGHAVRS-----SRNDLDFVDHITR
Os04g0565400 346 ILAHGATAAFMSHCGWNSMTMESLSHGKPI LAWPMHSDQPWDAELVCKYKAGLLVPRWEKHGEVVPATIQAVIERMMASDGLAVRQRAKALGHAVRS-----SRNDLDFVDHITR
Os04g0565600 343 ILAHGATAAFMSHCGWNSMTMESLSHGKPI LAWPMHSDQPWDAELVCKYKAGLLVPRWEKHGEVVPATIQAVIERMMASDGLAVRQRAKALGHAVRS-----SRNDLDFVDHITR
Os04g0565500 338 ILAHGATAAFMSHCGWNSMTMESLSHGKPI LAWPMHSDQPWDAELVCKYKAGLLVPRWEKHGEVVPATIQAVIERMMASDGLAVRQRAKALGHAVRS-----SRNDLDFVDHITR
Os04g0565600 338 ILAHGATAAFMSHCGWNSMTMESLSHGKPI LAWPMHSDQPWDAELVCKYKAGLLVPRWEKHGEVVPATIQAVIERMMASDGLAVRQRAKALGHAVRS-----SRNDLDFVDHITR
Os07g0660500 353 ILAHGATAAFMSHCGWNSMTMESLSHGKPI LAWPMHSDQPWDAELVCKYKAGLLVPRWEKHGEVVPATIQAVIERMMASDGLAVRQRAKALGHAVRS-----SRNDLDFVDHITR
Maize_cisZOG1 342 ILAHGATAAFMSHCGWNSMTMESLSHGKPI LAWPMHSDQPWDAELVCKYKAGLLVPRWEKHGEVVPATIQAVIERMMASDGLAVRQRAKALGHAVRS-----SRNDLDFVDHITR
Maize_cisZOG2 338 ILAHGATAAFMSHCGWNSMTMESLSHGKPI LAWPMHSDQPWDAELVCKYKAGLLVPRWEKHGEVVPATIQAVIERMMASDGLAVRQRAKALGHAVRS-----SRNDLDFVDHITR

```

**Supplemental Figure S1.** Multiple alignment of the deduced amino acid sequences of maize *cis*ZOGs and putative rice *cis*-zeatin-*O*-glucosyltransferases. The deduced amino acid sequences were obtained from GenBank (accession numbers AF318075 for maize *cis*ZOG1, and AY082660 for *cis*ZOG2; <http://www.ncbi.nlm.nih.gov/genbank/>) and The Rice Annotation Project Database (locus IDs Os04g0565400, Os04g0565500, Os04g0565600, Os04g0565200, Os04g0565400, and Os07g0660500 for putative rice *cis*-zeatin-*O*-glucosyltransferases; <http://rapdb.dna.affrc.go.jp/>). The alignment was performed using CLUSTAL W (<http://www.genome.jp/tools/clustalw/>). Identical and similar residues are shaded in black and grey, respectively. Dashes indicate gaps introduced to maximize sequence similarity. The glycosyltransferase domain (accession number cl10013) predicted by an NCBI Conserved Domain Search (<http://www.ncbi.nlm.nih.gov/Structure/cdd/wrpsb.cgi>) is highlighted in red.

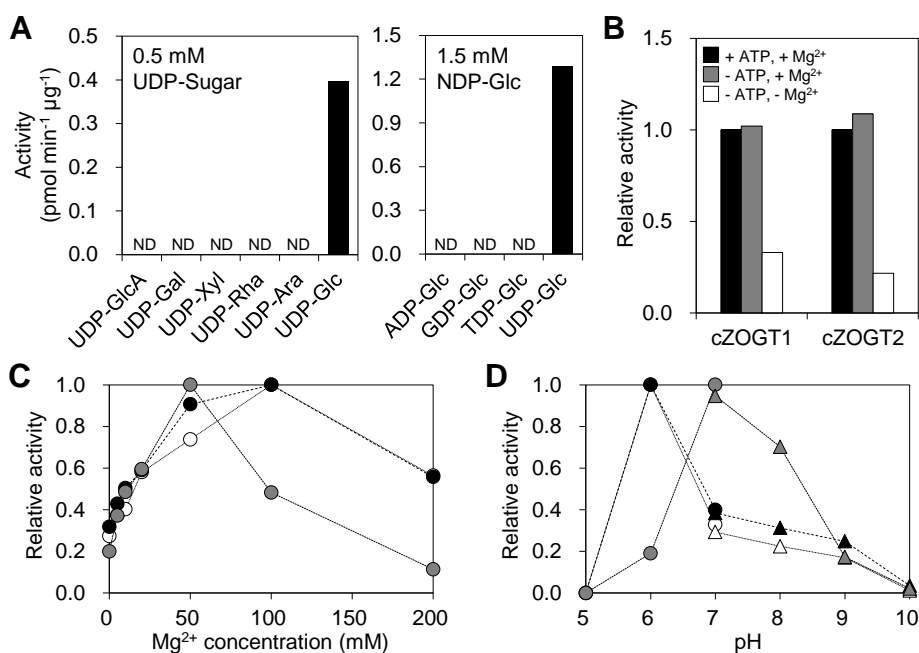

**Supplemental Figure S2.** Preliminary tests to determine conditions for an enzymatic activity assay for rice *cZ-O*-glucosyltransferases. A, substrate specificity of *cZOGT1* for various sugar donors in *O*-glucosylation of *cis*-zeatin-riboside (*cZR*). UDP-GlcA, Gal, Xyl, Rha, Ara, and Glc were tested at 0.5 mM (left panel) while ADP-, GDP-, TDP-, and UDP-Glc were tested at 1.5 mM (right panel). ND, not detected. B, relative *cZR-O*-glucosylation activity of *cZOGT1* and *cZOGT2* in the presence of 50 mM Mg<sup>2+</sup> as well as 0.5 mM ATP (black bars), of 50 mM Mg<sup>2+</sup> only (gray bars), and in the absence of both (white bars). *cZR* was used as a glucose acceptor. Activities were normalized to maximal values observed for a given enzyme. C, optimum concentrations of magnesium ions for *cZOGT1* (black circles), *cZOGT2* (gray circles), and *cZOGT3* (white circles) in *cZR-O*-glucosylation. Activities were normalized to the maximal values observed for each enzyme. D, optimum pH for *cZOGT1* (black symbols), *cZOGT2* (gray symbols), and *cZOGT3* (white symbols) in *cZR-O*-glucosylation. Tris-acetate buffer (circles) was used to prepare solutions of pH 5.0, 6.0, and 7.0, and Tris-HCl (triangles) was used to buffer solutions at pH 7.0, 8.0, 9.0, and 10.0. Activities were normalized to the maximal values observed for a given enzyme.

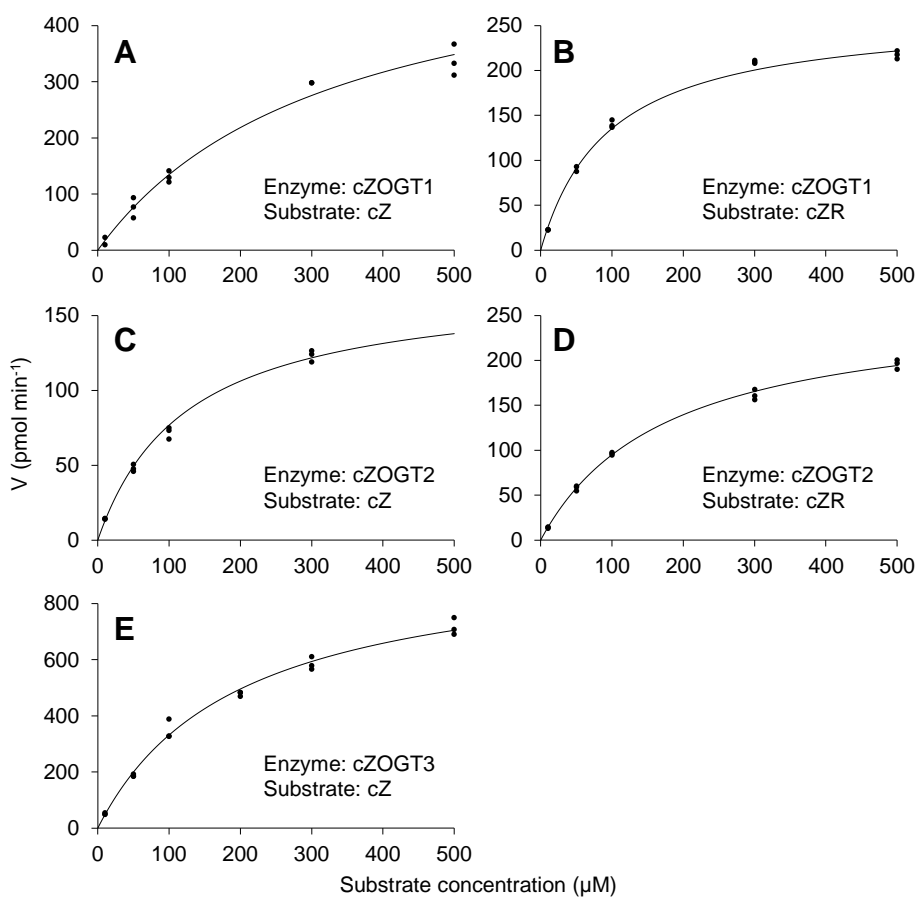

**Supplemental Figure S3.** Plots of velocities ( $v$ ) of *O*-glucosylation catalyzed by cZOGT1 (A, B), cZOGT2 (C, D), and cZOGT3 (E) against the concentrations of cZ (A, C, E) or cZR (B, D). Results from 3 technical repeats are shown.

|             | VC |   | cZOGT1-ox |   |   |   | cZOGT2-ox |   |   |    | cZOGT3-ox |   |    |
|-------------|----|---|-----------|---|---|---|-----------|---|---|----|-----------|---|----|
| Line number | 1  | 4 | 1         | 3 | 4 | 7 | 2         | 3 | 7 | 10 | 3         | 7 | 10 |
| cZOGT1      |    |   |           |   |   |   |           |   |   |    |           |   |    |
| cZOGT2      |    |   |           |   |   |   |           |   |   |    |           |   |    |
| cZOGT3      |    |   |           |   |   |   |           |   |   |    |           |   |    |
| Gpc1        |    |   |           |   |   |   |           |   |   |    |           |   |    |

**Supplemental Figure S4.** Over-expression of *cZOGT* genes in transgenic lines. Full-length coding sequences of *cZOGT* genes under the control of the *actin* promoter were introduced into rice. Total RNAs were extracted from seedling shoots of the transgenic rice and subjected to RT-PCR using gene-specific primers. The *Gpc1* gene encoding glyceraldehyde-3-phosphate dehydrogenase was used as a control.

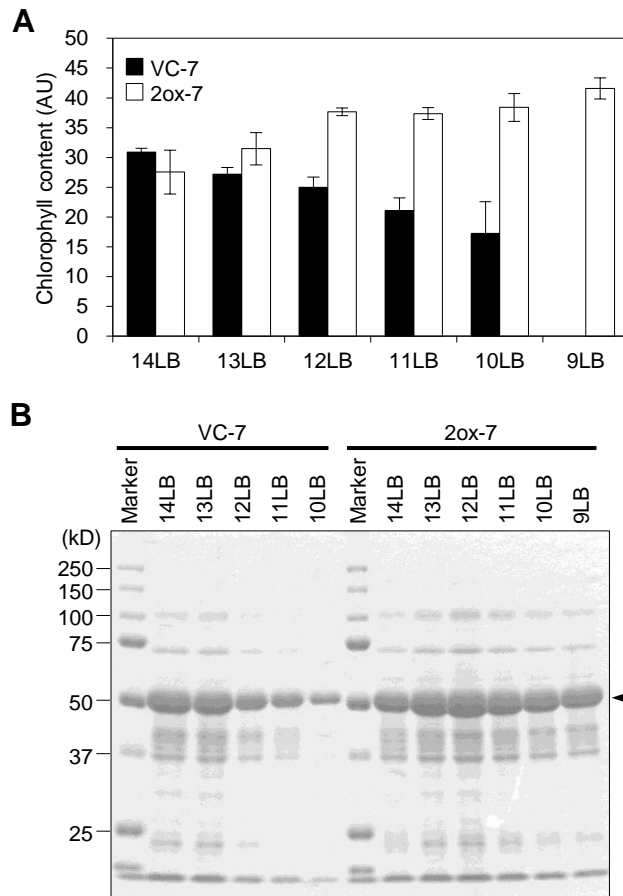

**Supplemental Figure S5.** Delay of leaf senescence in *cZOGT2* over-expressing rice. A transgenic rice line over-expressing *cZOGT2* (2ox-7, black bars) and the corresponding vector control (VC-7, white bars) were grown in soil for 104 days after seed imbibition. A, relative chlorophyll contents in leaf blades at the ninth (9LB), tenth (10LB), eleventh (11LB), twelfth (12LB), thirteenth (13LB), and fourteenth (14LB) nodal position of main culms, expressed as arbitrary units (AU). The 9LB in VC-7 plants had withered at the time of measurement. Mean values  $\pm$  SD of three plants are shown. B, Crude soluble proteins were extracted from the distal third of the leaf blades used for the experiments presented in A, and were separated by SDS-PAGE. Crude proteins equivalent to 1 mg of fresh weight were loaded onto each lane. On this photograph of the poly-acrylamide gel stained by Coomassie Brilliant Blue, the arrowhead indicates the large subunit of Rubisco. Molecular weights are given on left.

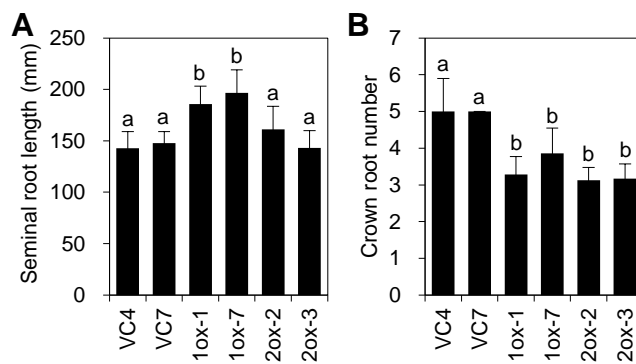

**Supplemental Figure S6.** Visible phenotypes in roots of *cZOGT1* and *cZOGT2* over-expressing rice lines at the seedling stage. Length of seminal roots (A) and number of crown roots (B) were determined in transgenic seedlings over-expressing *cZOGT1* (1ox-1, 1ox-7) and *cZOGT2* (2ox-2, 2ox-3), and in vector control plants (VC-4, VC-7); all plants had been grown hydroponically for 2 weeks after sowing. Means  $\pm$  SD of at least 12 and 6 plants are shown for root length (A) and root number (B), respectively. Different lower-case letters indicate statistically significant differences ( $P < 0.05$ ) in the Tukey-Kramer test following one-way ANOVA.

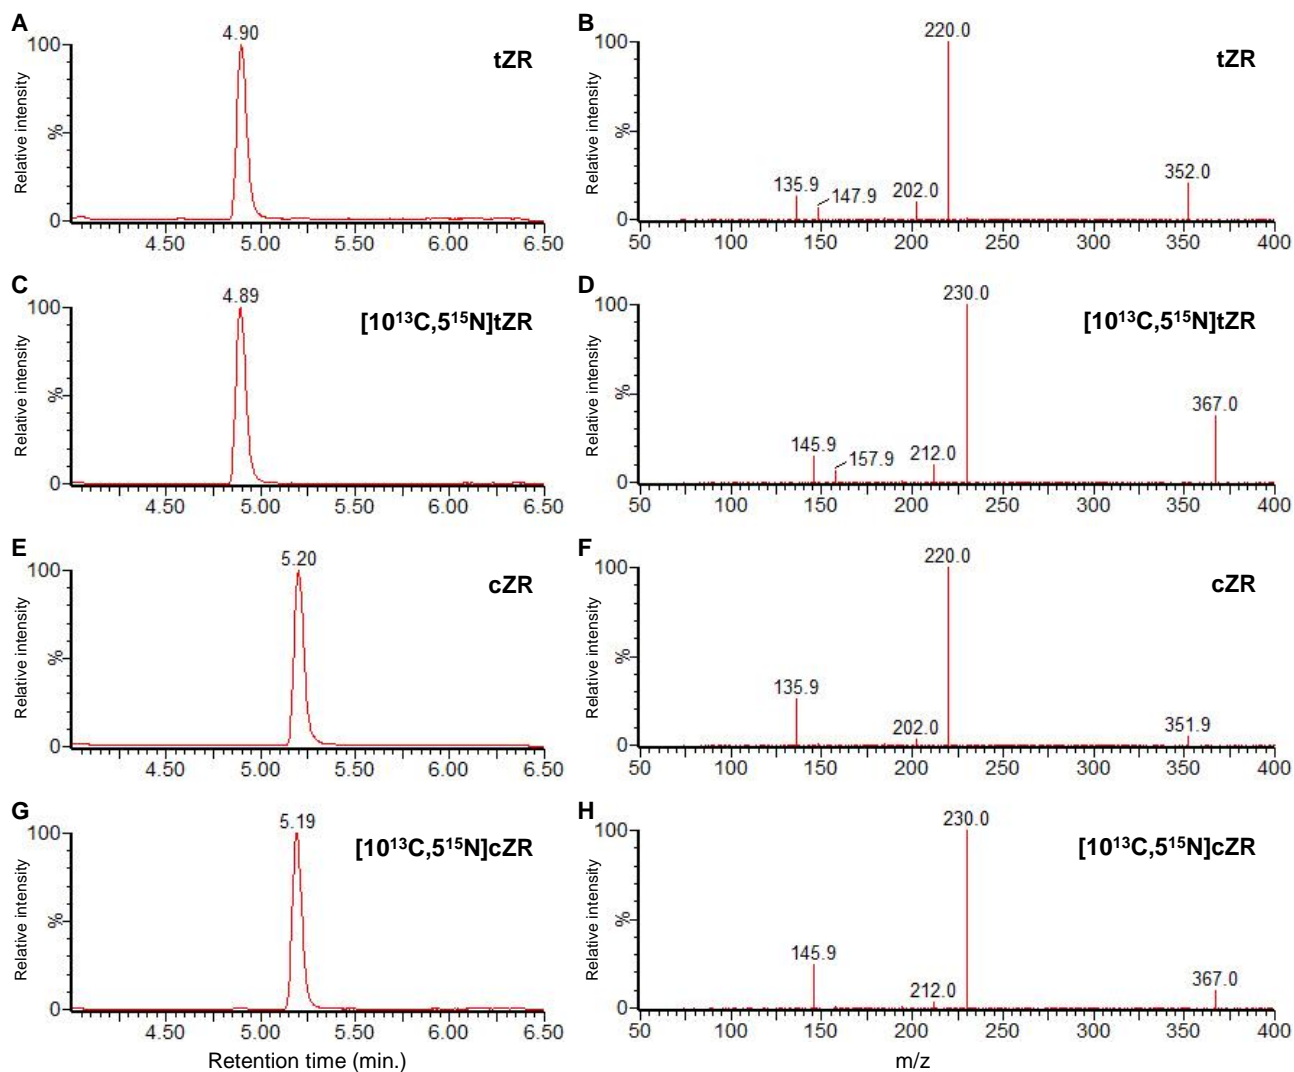

**Supplemental Figure S7.** UPLC-MS/MS analysis of authentic tZR (A and B) and cZR (C and D), and of synthesized  $[10^{13}\text{C}, 5^{15}\text{N}]$ tZR (E and F) and  $[10^{13}\text{C}, 5^{15}\text{N}]$ cZR (G and H). The numbers shown above the peaks in the chromatograms (A, C, E, and G) and mass spectra (B, D, F, and H) represent retention times and mass to charge ratio (m/z) of detected ions, respectively.

**Supplemental Table S1. Time-courses of cytokinin derivative contents of rice seedlings after application of  $[10^{13}\text{C}, 5^{15}\text{N}]\text{tZR}$ .**

One  $\mu\text{M}$  of  $[10^{13}\text{C}, 5^{15}\text{N}]\text{tZR}$  was supplied to 2-week-old rice seedlings. At the times of exposure indicated, root and shoot contents of cytokinin derivatives containing isotope labels were quantified by UPLC-MS/MS analysis. Values presented are means  $\pm$  SD of at least 3 plants.

| Cytokinins                             | Contents ( $\mu\text{mol g}^{-1}$ FW) |                   |                   |                   |                   |
|----------------------------------------|---------------------------------------|-------------------|-------------------|-------------------|-------------------|
|                                        | 1 h                                   | 3 h               | 6 h               | 12 h              | 24 h              |
| <b>cZ and cZ-derivatives in roots</b>  |                                       |                   |                   |                   |                   |
| cZRPs                                  | N.D.                                  | N.D.              | N.D.              | N.D.              | N.D.              |
| cZR                                    | N.D.                                  | N.D.              | N.D.              | 0.01 $\pm$ 0.02   | N.D.              |
| cZ                                     | N.D.                                  | N.D.              | N.D.              | N.D.              | 0.68              |
| cZRPsoG                                | 0.05 $\pm$ 0.02                       | 0.14 $\pm$ 0.16   | 0.07 $\pm$ 0.10   | 0.57 $\pm$ 0.57   | 0.37 $\pm$ 0.25   |
| cZROG                                  | 0.03 $\pm$ 0.02                       | 0.25 $\pm$ 0.08   | 0.34 $\pm$ 0.12   | 1.24 $\pm$ 1.46   | 1.11 $\pm$ 1.03   |
| cZOG                                   | N.D.                                  | N.D.              | N.D.              | N.D.              | N.D.              |
| <b>tZ and tZ-derivatives in roots</b>  |                                       |                   |                   |                   |                   |
| tZRPsoG                                | 623.2 $\pm$ 127.0                     | 804.4 $\pm$ 485.8 | 208.9 $\pm$ 70.81 | 15.37 $\pm$ 14.37 | 216.5 $\pm$ 476.2 |
| tZR                                    | 130.5 $\pm$ 39.0                      | 97.34 $\pm$ 54.67 | 20.96 $\pm$ 7.59  | 1.30 $\pm$ 1.22   | 23.39 $\pm$ 51.56 |
| tZ                                     | 242.1 $\pm$ 39.8                      | 493.2 $\pm$ 301.8 | 241.3 $\pm$ 39.57 | 35.09 $\pm$ 15.39 | 182.8 $\pm$ 339.5 |
| tZ7G                                   | N.D.                                  | N.D.              | N.D.              | N.D.              | N.D.              |
| tZ9G                                   | 238.6 $\pm$ 54.1                      | 2429 $\pm$ 1106   | 3471 $\pm$ 706    | 3510 $\pm$ 328    | 3788 $\pm$ 672    |
| tZRPsoG                                | N.D.                                  | N.D.              | N.D.              | N.D.              | N.D.              |
| tZROG                                  | 0.23 $\pm$ 0.05                       | 1.07 $\pm$ 0.32   | 1.76 $\pm$ 0.53   | 1.45 $\pm$ 0.35   | 1.36 $\pm$ 0.58   |
| tZOG                                   | 0.17 $\pm$ 0.06                       | 1.23 $\pm$ 0.19   | 2.30 $\pm$ 0.75   | 2.83 $\pm$ 1.11   | 2.11 $\pm$ 0.55   |
| <b>DZ and DZ-derivatives in roots</b>  |                                       |                   |                   |                   |                   |
| DZRPsoG                                | N.D.                                  | 0.07 $\pm$ 0.07   | N.D.              | 0.04 $\pm$ 0.04   | 0.08 $\pm$ 0.07   |
| DZR                                    | N.D.                                  | 0.05 $\pm$ 0.02   | 0.00 $\pm$ 0.01   | 0.05 $\pm$ 0.01   | 0.05 $\pm$ 0.02   |
| DZ                                     | N.D.                                  | N.D.              | N.D.              | N.D.              | N.D.              |
| DZ9G                                   | 0.22 $\pm$ 0.07                       | 3.91 $\pm$ 3.61   | 4.34 $\pm$ 0.76   | 7.45 $\pm$ 0.78   | 8.47 $\pm$ 3.52   |
| <b>iP and iP-derivatives in roots</b>  |                                       |                   |                   |                   |                   |
| iPRPsoG                                | N.D.                                  | N.D.              | N.D.              | N.D.              | N.D.              |
| iPR                                    | N.D.                                  | N.D.              | N.D.              | N.D.              | N.D.              |
| iP                                     | N.D.                                  | N.D.              | N.D.              | N.D.              | N.D.              |
| iP7G                                   | N.D.                                  | N.D.              | N.D.              | N.D.              | N.D.              |
| iP9G                                   | N.D.                                  | N.D.              | N.D.              | N.D.              | N.D.              |
| <b>cZ and cZ-derivatives in shoots</b> |                                       |                   |                   |                   |                   |
| cZRPsoG                                | N.D.                                  | N.D.              | N.D.              | N.D.              | N.D.              |
| cZR                                    | N.D.                                  | N.D.              | N.D.              | 0.01 $\pm$ 0.01   | N.D.              |
| cZ                                     | N.D.                                  | N.D.              | N.D.              | N.D.              | N.D.              |
| cZRPsoG                                | N.D.                                  | N.D.              | N.D.              | 0.01 $\pm$ 0.02   | 0.01 $\pm$ 0.03   |
| cZROG                                  | 0.19 $\pm$ 0.09                       | 0.12 $\pm$ 0.10   | 0.03 $\pm$ 0.03   | 0.04 $\pm$ 0.02   | 0.02 $\pm$ 0.02   |
| cZOG                                   | N.D.                                  | N.D.              | N.D.              | N.D.              | N.D.              |
| <b>tZ and tZ-derivatives in shoots</b> |                                       |                   |                   |                   |                   |
| tZRPsoG                                | 11.31 $\pm$ 3.69                      | 26.55 $\pm$ 5.74  | 6.47 $\pm$ 3.46   | 0.71 $\pm$ 0.28   | 0.45 $\pm$ 0.30   |
| tZR                                    | 6.00 $\pm$ 2.25                       | 5.93 $\pm$ 3.02   | 1.53 $\pm$ 0.71   | 0.27 $\pm$ 0.14   | 0.06 $\pm$ 0.05   |
| tZ                                     | 9.11 $\pm$ 4.55                       | 14.72 $\pm$ 2.46  | 4.05 $\pm$ 1.33   | 1.77 $\pm$ 0.50   | 1.36 $\pm$ 0.36   |
| tZ7G                                   | N.D.                                  | N.D.              | N.D.              | N.D.              | N.D.              |
| tZ9G                                   | 2.36 $\pm$ 0.68                       | 20.04 $\pm$ 7.34  | 18.26 $\pm$ 7.02  | 20.25 $\pm$ 4.89  | 26.99 $\pm$ 11.42 |
| tZRPsoG                                | N.D.                                  | N.D.              | N.D.              | N.D.              | N.D.              |
| tZROG                                  | 0.00 $\pm$ 0.01                       | 0.05 $\pm$ 0.03   | 0.04 $\pm$ 0.01   | 0.03 $\pm$ 0.01   | 0.01 $\pm$ 0.01   |
| tZOG                                   | 0.25 $\pm$ 0.11                       | 0.20 $\pm$ 0.02   | 0.22 $\pm$ 0.08   | 0.25 $\pm$ 0.09   | 0.23 $\pm$ 0.05   |
| <b>DZ and DZ-derivatives in shoots</b> |                                       |                   |                   |                   |                   |
| DZRPsoG                                | 0.03 $\pm$ 0.03                       | 0.00 $\pm$ 0.01   | 0.01 $\pm$ 0.01   | N.D.              | 0.01 $\pm$ 0.03   |
| DZR                                    | N.D.                                  | N.D.              | N.D.              | N.D.              | 0.00 $\pm$ 0.01   |
| DZ                                     | N.D.                                  | N.D.              | N.D.              | N.D.              | N.D.              |
| DZ9G                                   | N.D.                                  | N.D.              | N.D.              | N.D.              | N.D.              |
| <b>iP and iP-derivatives in shoots</b> |                                       |                   |                   |                   |                   |
| iPRPsoG                                | N.D.                                  | N.D.              | N.D.              | N.D.              | N.D.              |
| iPR                                    | N.D.                                  | N.D.              | N.D.              | N.D.              | N.D.              |
| iP                                     | N.D.                                  | N.D.              | N.D.              | N.D.              | N.D.              |
| iP7G                                   | N.D.                                  | N.D.              | N.D.              | N.D.              | N.D.              |
| iP9G                                   | N.D.                                  | N.D.              | N.D.              | N.D.              | N.D.              |

FW, fresh weight; N.D., not detected; cZ, *cis*-zeatin; tZ, *trans*-zeatin; iP,  $N^6$ - $(\Delta^2$ -isopentenyl)adenine; DZ, dihydrozeatin; cZR, cZ-riboside; tZR, tZ-riboside; iPR, iP-riboside; DZR, DZ-riboside; cZRPsoG, cZ-ribotides; tZRPsoG, tZ-ribotides; iPRPsoG, iP-ribotides; DZRPsoG, DZ-ribotides; tZ7G, tZ-7-*N*-glucoside; iP7G, iP-7-*N*-glucoside; tZ9G, tZ-9-*N*-glucoside; iP9G, iP-9-*N*-glucoside; DZ9G, DZ-9-*N*-glucoside; cZOG, cZ-*O*-glucoside; tZOG, tZ-*O*-glucoside; cZROG, cZR-*O*-glucoside; tZROG, tZR-*O*-glucoside; cZRPsoG, cZRPsoG-*O*-glucoside; and tZRPsoG, tZRPsoG-*O*-glucoside.



**Supplemental Table S2. Time-courses of cytokinin derivative contents of rice seedlings after application of  $[10^{13}\text{C}, 5^{15}\text{N}]\text{cZR}$ .**

One  $\mu\text{M}$  of  $[10^{13}\text{C}, 5^{15}\text{N}]\text{cZR}$  was supplied to 2-week-old rice seedlings. At the times of exposure indicated, root and shoot contents of cytokinin derivatives containing isotope labels were quantified by UPLC-MS/MS analysis. Values presented are means  $\pm$  SD of at least 3 plants.

| Cytokinins                             | Contents (pmol g <sup>-1</sup> FW) |                   |                  |                   |                  |
|----------------------------------------|------------------------------------|-------------------|------------------|-------------------|------------------|
|                                        | 1 h                                | 3 h               | 6 h              | 12 h              | 24 h             |
| <b>cZ and cZ-derivatives in roots</b>  |                                    |                   |                  |                   |                  |
| cZRP                                   | 54.78 $\pm$ 12.50                  | 26.97 $\pm$ 18.99 | 14.26 $\pm$ 7.00 | 2.80 $\pm$ 1.36   | 2.33 $\pm$ 0.32  |
| cZR                                    | 125.1 $\pm$ 19.6                   | 73.11 $\pm$ 31.45 | 17.68 $\pm$ 2.31 | 12.36 $\pm$ 1.86  | 9.88 $\pm$ 2.56  |
| cZ                                     | 153.7 $\pm$ 44.5                   | 196.3 $\pm$ 10.1  | 196.3 $\pm$ 34.0 | 49.39 $\pm$ 7.06  | 29.32 $\pm$ 7.27 |
| cZRP                                   | 220.8 $\pm$ 10.1                   | 258.6 $\pm$ 90.5  | 190.6 $\pm$ 50.5 | 45.52 $\pm$ 19.79 | 30.66 $\pm$ 9.00 |
| cZROG                                  | 149.9 $\pm$ 25.8                   | 492.3 $\pm$ 85.0  | 1127 $\pm$ 167   | 1150 $\pm$ 99     | 1523 $\pm$ 39    |
| cZOG                                   | 909.0 $\pm$ 133.0                  | 5153 $\pm$ 1183   | 6695 $\pm$ 474   | 8582 $\pm$ 1518   | 7698 $\pm$ 1272  |
| <b>tZ and tZ-derivatives in roots</b>  |                                    |                   |                  |                   |                  |
| tZRP                                   | 6.52 $\pm$ 0.71                    | 5.67 $\pm$ 4.21   | 1.96 $\pm$ 1.12  | 0.60 $\pm$ 1.08   | 0.12 $\pm$ 0.15  |
| tZR                                    | 3.58 $\pm$ 1.01                    | 4.02 $\pm$ 1.31   | 2.86 $\pm$ 2.09  | 2.12 $\pm$ 1.46   | 1.82 $\pm$ 1.23  |
| tZ                                     | 3.52 $\pm$ 0.49                    | 5.47 $\pm$ 2.44   | 3.37 $\pm$ 0.52  | 2.43 $\pm$ 2.47   | 0.48 $\pm$ 0.68  |
| tZ7G                                   | N.D.                               | N.D.              | N.D.             | N.D.              | N.D.             |
| tZ9G                                   | N.D.                               | N.D.              | N.D.             | N.D.              | N.D.             |
| tZRP                                   | N.D.                               | N.D.              | N.D.             | N.D.              | N.D.             |
| tZROG                                  | 0.11 $\pm$ 0.01                    | 0.42 $\pm$ 0.08   | 0.78 $\pm$ 0.10  | 1.26 $\pm$ 0.04   | 1.91 $\pm$ 0.18  |
| tZOG                                   | 0.28 $\pm$ 0.07                    | 1.79 $\pm$ 0.17   | 2.06 $\pm$ 0.27  | 3.52 $\pm$ 0.53   | 5.71 $\pm$ 3.77  |
| <b>DZ and DZ-derivatives in roots</b>  |                                    |                   |                  |                   |                  |
| DZRP                                   | 0.34 $\pm$ 0.16                    | N.D.              | 0.08 $\pm$ 0.06  | 0.01 $\pm$ 0.03   | N.D.             |
| DZR                                    | 0.01 $\pm$ 0.02                    | N.D.              | 0.01 $\pm$ 0.02  | 0.02 $\pm$ 0.02   | 0.00 $\pm$ 0.01  |
| DZ                                     | N.D.                               | N.D.              | N.D.             | N.D.              | N.D.             |
| DZ9G                                   | N.D.                               | N.D.              | 2.47             | N.D.              | N.D.             |
| <b>iP and iP-derivatives in roots</b>  |                                    |                   |                  |                   |                  |
| iPRP                                   | N.D.                               | N.D.              | N.D.             | N.D.              | N.D.             |
| iPR                                    | N.D.                               | N.D.              | N.D.             | N.D.              | N.D.             |
| iP                                     | N.D.                               | N.D.              | N.D.             | N.D.              | N.D.             |
| iP7G                                   | N.D.                               | N.D.              | N.D.             | N.D.              | N.D.             |
| iP9G                                   | N.D.                               | N.D.              | N.D.             | N.D.              | N.D.             |
| <b>cZ and cZ-derivatives in shoots</b> |                                    |                   |                  |                   |                  |
| cZRP                                   | 1.04 $\pm$ 0.15                    | 0.93 $\pm$ 0.64   | 0.27 $\pm$ 0.15  | 0.16 $\pm$ 0.08   | 0.18 $\pm$ 0.04  |
| cZR                                    | 9.78 $\pm$ 3.45                    | 3.11 $\pm$ 2.01   | 1.97 $\pm$ 1.04  | 1.63 $\pm$ 0.87   | 1.88 $\pm$ 0.99  |
| cZ                                     | 11.84 $\pm$ 2.53                   | 8.96 $\pm$ 6.04   | 4.81 $\pm$ 2.50  | 5.88 $\pm$ 1.34   | 2.72 $\pm$ 1.01  |
| cZRP                                   | 2.58 $\pm$ 0.54                    | 3.92 $\pm$ 1.52   | 1.43 $\pm$ 0.71  | 1.23 $\pm$ 0.28   | 1.20 $\pm$ 0.39  |
| cZROG                                  | 3.62 $\pm$ 1.49                    | 20.17 $\pm$ 12.55 | 21.30 $\pm$ 5.68 | 24.76 $\pm$ 7.95  | 40.22 $\pm$ 9.41 |
| cZOG                                   | 31.69 $\pm$ 13.78                  | 151.5 $\pm$ 77.9  | 141.5 $\pm$ 45.0 | 129.2 $\pm$ 43.0  | 212.2 $\pm$ 70.9 |
| <b>tZ and tZ-derivatives in shoots</b> |                                    |                   |                  |                   |                  |
| tZRP                                   | 0.11 $\pm$ 0.02                    | 0.21 $\pm$ 0.08   | 0.10 $\pm$ 0.03  | 0.05 $\pm$ 0.02   | 0.07 $\pm$ 0.03  |
| tZR                                    | 0.01 $\pm$ 0.03                    | 0.03 $\pm$ 0.04   | 0.06 $\pm$ 0.09  | 0.06 $\pm$ 0.09   | 0.16 $\pm$ 0.10  |
| tZ                                     | 0.33 $\pm$ 0.09                    | 0.53 $\pm$ 0.30   | 0.87 $\pm$ 0.41  | 0.32 $\pm$ 0.45   | 0.66 $\pm$ 0.20  |
| tZ7G                                   | N.D.                               | N.D.              | N.D.             | N.D.              | N.D.             |
| tZ9G                                   | N.D.                               | N.D.              | N.D.             | N.D.              | N.D.             |
| tZRP                                   | N.D.                               | N.D.              | N.D.             | N.D.              | N.D.             |
| tZROG                                  | N.D.                               | N.D.              | N.D.             | 0.01 $\pm$ 0.02   | 0.03 $\pm$ 0.01  |
| tZOG                                   | 0.27 $\pm$ 0.13                    | 0.12 $\pm$ 0.03   | 0.12 $\pm$ 0.06  | 0.16 $\pm$ 0.03   | 0.35 $\pm$ 0.14  |
| <b>DZ and DZ-derivatives in shoots</b> |                                    |                   |                  |                   |                  |
| DZRP                                   | 0.00 $\pm$ 0.00                    | N.D.              | 0.01 $\pm$ 0.01  | 0.02 $\pm$ 0.03   | 0.01 $\pm$ 0.01  |
| DZR                                    | N.D.                               | N.D.              | N.D.             | N.D.              | N.D.             |
| DZ                                     | N.D.                               | N.D.              | N.D.             | N.D.              | N.D.             |
| DZ9G                                   | N.D.                               | N.D.              | N.D.             | N.D.              | 0.45             |
| <b>iP and iP-derivatives in shoots</b> |                                    |                   |                  |                   |                  |
| iPRP                                   | N.D.                               | N.D.              | N.D.             | N.D.              | N.D.             |
| iPR                                    | N.D.                               | N.D.              | N.D.             | N.D.              | N.D.             |
| iP                                     | N.D.                               | N.D.              | N.D.             | N.D.              | N.D.             |
| iP7G                                   | N.D.                               | N.D.              | N.D.             | N.D.              | N.D.             |
| iP9G                                   | N.D.                               | N.D.              | N.D.             | N.D.              | N.D.             |

FW, fresh weight; N.D., not detected; cZ, *cis*-zeatin; tZ, *trans*-zeatin; iP, *N*<sup>6</sup>-( $\Delta^2$ -isopentenyl)adenine; DZ, dihydrozeatin; cZR, cZ-riboside; tZR, tZ-riboside; iPR, iP-riboside; DZR, DZ-riboside; cZRP, cZ-ribotide; tZRP, tZ-ribotide; iPRP, iP-ribotide; DZRP, DZ-ribotide; tZ7G, tZ-7-*N*-glucoside; iP7G, iP-7-*N*-glucoside; tZ9G, tZ-9-*N*-glucoside; iP9G, iP-9-*N*-glucoside; DZ9G, DZ-9-*N*-glucoside; cZOG, cZ-*O*-glucoside; tZOG, tZ-*O*-glucoside; cZROG, cZ-*O*-glucoside; tZROG, tZ-*O*-glucoside; cZRP-OG, cZRP-*O*-glucoside; and tZRP-OG, tZRP-*O*-glucoside.

**Supplemental Table S3. Cytokinin contents in shoots of cZOGT over-expressing lines and vector control lines.**

Transgenic rice plants over-expressing *cZOGT1* (1ox-7), *cZOGT2* (2ox-2, 2ox-3), and *cZOGT3* (3ox-7, 3ox-9) were grown in soil with vector control plants (VC-1, VC-3, VC-4). Data shown are means  $\pm$  SD of three plants.

| Line                         | Transgene     | GEN | Contents (pmol g <sup>-1</sup> FW) |                 |                 |                               |                               |                               |
|------------------------------|---------------|-----|------------------------------------|-----------------|-----------------|-------------------------------|-------------------------------|-------------------------------|
| <b>cZ and cZ-derivatives</b> |               |     | <b>cZRPs<sup>s</sup></b>           | <b>cZR</b>      | <b>cZ</b>       | <b>cZRPsOG<sup>s</sup></b>    | <b>cZROG<sup>s</sup></b>      | <b>cZOG<sup>s</sup></b>       |
| VC-1                         | Empty vector  | T3  | 0.25 $\pm$ 0.05                    | 2.63 $\pm$ 0.65 | 0.84 $\pm$ 0.23 | 1.33 $\pm$ 0.22 <sup>a</sup>  | 10.2 $\pm$ 0.37               | 145 $\pm$ 24.6 <sup>ab</sup>  |
| VC-4                         | Empty vector  | T3  | 0.23 $\pm$ 0.01                    | 2.59 $\pm$ 0.25 | 0.83 $\pm$ 0.20 | 1.28 $\pm$ 0.09 <sup>ab</sup> | 10.3 $\pm$ 0.67               | 160 $\pm$ 8.18 <sup>a</sup>   |
| 1ox-7                        | <i>cZOGT1</i> | T3  | 0.34 $\pm$ 0.04                    | 3.46 $\pm$ 0.47 | 0.75 $\pm$ 0.06 | 1.63 $\pm$ 0.13 <sup>b</sup>  | 11.3 $\pm$ 1.29               | 182 $\pm$ 4.83 <sup>abc</sup> |
| 2ox-2                        | <i>cZOGT2</i> | T3  | 0.31 $\pm$ 0.06                    | 2.68 $\pm$ 0.25 | 0.66 $\pm$ 0.02 | 1.84 $\pm$ 0.09 <sup>ab</sup> | 11.5 $\pm$ 2.33               | 177 $\pm$ 9.42 <sup>c</sup>   |
| 2ox-3                        | <i>cZOGT2</i> | T3  | 0.31 $\pm$ 0.04                    | 3.31 $\pm$ 0.33 | 0.76 $\pm$ 0.03 | 1.72 $\pm$ 0.18 <sup>ab</sup> | 10.0 $\pm$ 1.44               | 174 $\pm$ 7.59 <sup>bc</sup>  |
| VC-3                         | Empty vector  | T1  | 0.26 $\pm$ 0.03                    | 2.50 $\pm$ 0.22 | 0.86 $\pm$ 0.07 | 1.37 $\pm$ 0.07               | 11.0 $\pm$ 0.56 <sup>a</sup>  | 161 $\pm$ 24.6                |
| VC-4                         | Empty vector  | T1  | 0.33 $\pm$ 0.01                    | 3.02 $\pm$ 0.30 | 1.14 $\pm$ 0.36 | 1.53 $\pm$ 0.29               | 11.5 $\pm$ 0.67 <sup>ab</sup> | 168 $\pm$ 7.61                |
| 3ox-7                        | <i>cZOGT3</i> | T1  | 0.35 $\pm$ 0.07                    | 3.87 $\pm$ 1.34 | 1.00 $\pm$ 0.05 | 1.24 $\pm$ 0.23               | 10.8 $\pm$ 0.29 <sup>a</sup>  | 179 $\pm$ 13.3                |
| 3ox-9                        | <i>cZOGT3</i> | T1  | 0.22 $\pm$ 0.07                    | 3.76 $\pm$ 1.18 | 0.84 $\pm$ 0.25 | 1.34 $\pm$ 0.08               | 13.0 $\pm$ 0.66 <sup>b</sup>  | 156 $\pm$ 17.8                |
| <b>tZ and tZ-derivatives</b> |               |     | <b>tZRPs</b>                       | <b>tZR</b>      | <b>tZ</b>       | <b>tZ9G</b>                   | <b>tZROG<sup>s</sup></b>      | <b>tZOG<sup>s</sup></b>       |
| VC-1                         | Empty vector  | T3  | 0.25 $\pm$ 0.17                    | 0.21 $\pm$ 0.11 | 0.32 $\pm$ 0.11 | 13.9 $\pm$ 2.85               | 0.03 $\pm$ 0.01 <sup>ab</sup> | 0.32 $\pm$ 0.06 <sup>a</sup>  |
| VC-4                         | Empty vector  | T3  | 0.36 $\pm$ 0.29                    | 0.26 $\pm$ 0.21 | 0.41 $\pm$ 0.04 | 15.5 $\pm$ 2.11               | 0.02 $\pm$ 0.00 <sup>a</sup>  | 0.32 $\pm$ 0.03 <sup>a</sup>  |
| 1ox-7                        | <i>cZOGT1</i> | T3  | 0.70 $\pm$ 0.36                    | 0.36 $\pm$ 0.18 | 0.51 $\pm$ 0.13 | 19.2 $\pm$ 3.77               | 0.08 $\pm$ 0.01 <sup>cd</sup> | 0.51 $\pm$ 0.07 <sup>a</sup>  |
| 2ox-2                        | <i>cZOGT2</i> | T3  | 0.64 $\pm$ 0.09                    | 0.44 $\pm$ 0.14 | 0.41 $\pm$ 0.03 | 21.0 $\pm$ 2.98               | 0.10 $\pm$ 0.02 <sup>d</sup>  | 0.75 $\pm$ 0.16 <sup>b</sup>  |
| 2ox-3                        | <i>cZOGT2</i> | T3  | 0.60 $\pm$ 0.05                    | 0.37 $\pm$ 0.02 | 0.45 $\pm$ 0.04 | 21.4 $\pm$ 4.57               | 0.06 $\pm$ 0.01 <sup>bc</sup> | 0.48 $\pm$ 0.07 <sup>a</sup>  |
| VC-3                         | Empty vector  | T1  | 0.26 $\pm$ 0.08                    | 0.17 $\pm$ 0.06 | 0.37 $\pm$ 0.10 | 19.2 $\pm$ 4.73               | 0.04 $\pm$ 0.00 <sup>a</sup>  | 0.41 $\pm$ 0.06 <sup>a</sup>  |
| VC-4                         | Empty vector  | T1  | 0.32 $\pm$ 0.15                    | 0.23 $\pm$ 0.10 | 0.36 $\pm$ 0.11 | 18.7 $\pm$ 2.67               | 0.05 $\pm$ 0.00 <sup>a</sup>  | 0.47 $\pm$ 0.06 <sup>a</sup>  |
| 3ox-7                        | <i>cZOGT3</i> | T1  | 0.29 $\pm$ 0.13                    | 0.39 $\pm$ 0.13 | 0.58 $\pm$ 0.12 | 12.8 $\pm$ 1.69               | 0.68 $\pm$ 0.27 <sup>b</sup>  | 18.0 $\pm$ 6.18 <sup>b</sup>  |
| 3ox-9                        | <i>cZOGT3</i> | T1  | 0.29 $\pm$ 0.09                    | 0.43 $\pm$ 0.17 | 0.38 $\pm$ 0.16 | 13.4 $\pm$ 1.61               | 0.44 $\pm$ 0.17 <sup>ab</sup> | 12.7 $\pm$ 3.80 <sup>b</sup>  |
| <b>iP and iP-derivatives</b> |               |     | <b>iPRPs</b>                       | <b>iPR</b>      | <b>iP</b>       | <b>iP9G</b>                   |                               |                               |
| VC-1                         | Empty vector  | T3  | 0.54 $\pm$ 0.21                    | 0.03 $\pm$ 0.01 | 0.99 $\pm$ 0.18 | 0.50 $\pm$ 0.08               |                               |                               |
| VC-4                         | Empty vector  | T3  | 0.55 $\pm$ 0.10                    | 0.04 $\pm$ 0.02 | 0.24 $\pm$ 0.02 | 0.65 $\pm$ 0.10               |                               |                               |
| 1ox-7                        | <i>cZOGT1</i> | T3  | 0.65 $\pm$ 0.14                    | 0.03 $\pm$ 0.00 | 0.31 $\pm$ 0.11 | 0.53 $\pm$ 0.06               |                               |                               |
| 2ox-2                        | <i>cZOGT2</i> | T3  | 0.58 $\pm$ 0.06                    | 0.05 $\pm$ 0.02 | 1.37 $\pm$ 0.73 | 0.66 $\pm$ 0.14               |                               |                               |
| 2ox-3                        | <i>cZOGT2</i> | T3  | 0.54 $\pm$ 0.12                    | 0.03 $\pm$ 0.01 | 0.23 $\pm$ 0.03 | 0.53 $\pm$ 0.09               |                               |                               |
| VC-3                         | Empty vector  | T1  | 0.60 $\pm$ 0.10                    | 0.06 $\pm$ 0.03 | 0.39 $\pm$ 0.07 | 0.63 $\pm$ 0.03               |                               |                               |
| VC-4                         | Empty vector  | T1  | 0.45 $\pm$ 0.09                    | 0.04 $\pm$ 0.01 | 0.35 $\pm$ 0.06 | 0.50 $\pm$ 0.09               |                               |                               |
| 3ox-7                        | <i>cZOGT3</i> | T1  | 0.45 $\pm$ 0.20                    | 0.04 $\pm$ 0.01 | 0.29 $\pm$ 0.04 | 0.44 $\pm$ 0.05               |                               |                               |
| 3ox-9                        | <i>cZOGT3</i> | T1  | 0.67 $\pm$ 0.22                    | 0.06 $\pm$ 0.03 | 0.46 $\pm$ 0.16 | 0.46 $\pm$ 0.04               |                               |                               |
| <b>DZ and DZ-derivatives</b> |               |     | <b>DZRPs</b>                       | <b>DZR</b>      | <b>DZ</b>       | <b>DZ9G</b>                   |                               |                               |
| VC-1                         | Empty vector  | T3  | N.D.                               | N.D.            | N.D.            | N.D.                          |                               |                               |
| VC-4                         | Empty vector  | T3  | N.D.                               | N.D.            | N.D.            | N.D.                          |                               |                               |
| 1ox-7                        | <i>cZOGT1</i> | T3  | N.D.                               | N.D.            | N.D.            | N.D.                          |                               |                               |
| 2ox-2                        | <i>cZOGT2</i> | T3  | N.D.                               | N.D.            | N.D.            | N.D.                          |                               |                               |
| 2ox-3                        | <i>cZOGT2</i> | T3  | N.D.                               | N.D.            | N.D.            | N.D.                          |                               |                               |
| VC-3                         | Empty vector  | T1  | N.D.                               | N.D.            | N.D.            | N.D.                          |                               |                               |
| VC-4                         | Empty vector  | T1  | N.D.                               | N.D.            | N.D.            | N.D.                          |                               |                               |
| 3ox-7                        | <i>cZOGT3</i> | T1  | N.D.                               | N.D.            | N.D.            | N.D.                          |                               |                               |
| 3ox-9                        | <i>cZOGT3</i> | T1  | N.D.                               | N.D.            | N.D.            | N.D.                          |                               |                               |
| <b>oT and oT-derivatives</b> |               |     | <b>oTR</b>                         | <b>oT</b>       | <b>oTROG</b>    | <b>oTOG</b>                   |                               |                               |
| VC-1                         | Empty vector  | T3  | N.D.                               | N.D.            | N.D.            | N.D.                          |                               |                               |
| VC-4                         | Empty vector  | T3  | N.D.                               | N.D.            | N.D.            | N.D.                          |                               |                               |
| 1ox-7                        | <i>cZOGT1</i> | T3  | N.D.                               | N.D.            | N.D.            | N.D.                          |                               |                               |
| 2ox-2                        | <i>cZOGT2</i> | T3  | N.D.                               | N.D.            | N.D.            | N.D.                          |                               |                               |
| 2ox-3                        | <i>cZOGT2</i> | T3  | N.D.                               | N.D.            | N.D.            | N.D.                          |                               |                               |
| VC-3                         | Empty vector  | T1  | N.D.                               | N.D.            | N.D.            | N.D.                          |                               |                               |
| VC-4                         | Empty vector  | T1  | N.D.                               | N.D.            | N.D.            | N.D.                          |                               |                               |
| 3ox-7                        | <i>cZOGT3</i> | T1  | N.D.                               | N.D.            | N.D.            | N.D.                          |                               |                               |
| 3ox-9                        | <i>cZOGT3</i> | T1  | N.D.                               | N.D.            | N.D.            | N.D.                          |                               |                               |

<sup>s</sup> Statistically significant difference between transgenic lines in the same generation were detected by one-way ANOVA ( $P < 0.05$ ).

<sup>a-d</sup> Different lower-case letters indicate statistically significant difference between transgenic lines in the same generation (Tukey-Kramer test,  $P < 0.05$ ).

GEN, generation of transgenic rice; FW, fresh weight; N.D., not detected; cZ, *cis*-zeatin; tZ, *trans*-zeatin; iP, *N*<sup>6</sup>-( $\Delta^2$ -isopentenyl)adenine; DZ, dihydrozeatin; oT, *ortho*-topolin; cZR, cZ-riboside; tZR, tZ-riboside; iPR, iP-riboside; DZR, DZ-riboside; oTR, DZ-riboside; cZRPs, cZ-ribotides; tZRPs, tZ-ribotides; iPRPs, iP-ribotides; DZRPs, DZ-ribotides; tZ9G, tZ-9-*N*-glucoside; iP9G, iP-9-*N*-glucoside; DZ9G, DZ-9-*N*-glucoside; cZOG, cZ-O-glucoside; tZOG, tZ-O-glucoside; oTOG, oT-O-glucoside; cZROG, cZ-R-O-glucoside; tZROG, tZ-R-O-glucoside; oTROG, oTR-O-glucoside; and cZRPsOG, cZRPs-O-glucoside.

**Supplemental Table S4. Primers used in this study.**

| Nos. | Sequence                                            | Use application                                            |
|------|-----------------------------------------------------|------------------------------------------------------------|
| 1    | 5'-GATGGTCAAACGGCTGCTTCCTCAA-3'                     | Quantitative RT-PCR for <i>OsRR1</i>                       |
| 2    | 5'-CAGTTGCAGCCTGCCTTTGCATTTG-3'                     | Quantitative RT-PCR for <i>OsRR1</i>                       |
| 3    | 5'-GATGCCCACTCAAATCATGCGTTCC-3'                     | Quantitative RT-PCR for <i>OsRR2</i>                       |
| 4    | 5'-TGATACGCTGATGCAACTGTCCGGAG-3'                    | Quantitative RT-PCR for <i>OsRR2</i>                       |
| 5    | 5'-TGGAGGAGGGGGCTGAAGACTTTTTG-3'                    | Quantitative RT-PCR for <i>OsRR3</i>                       |
| 6    | 5'-CATTTTCATGATGACGCGTTGCAAAG-3'                    | Quantitative RT-PCR for <i>OsRR3</i>                       |
| 7    | 5'-AACAGCAGCAGCAGCACTAGCAGCAA-3'                    | Quantitative RT-PCR for <i>OsRR9/10</i>                    |
| 8    | 5'-CAGTGTCAAATGACCAGTCAGATGCT-3'                    | Quantitative RT-PCR for <i>OsRR9/10</i>                    |
| 9    | 5'-CCATATGATGGAGCCGGTGGCCGTC-3'                     | Cloning of Os04g0556400 CDS into pCold-I                   |
| 10   | 5'-GGTCGACCTACCCGTGGCTCAGGCTC-3'                    | Cloning of Os04g0556400 CDS into pCold-I                   |
| 11   | 5'-AGGTACCATGGCGATTGGCAGGTGG-3'                     | Cloning of Os04g0556500 ( <i>cZOGT1</i> ) CDS into pCold-I |
| 12   | 5'-CTCTAGATCATCTTGTGATGTAGCCAACG-3'                 | Cloning of Os04g0556500 ( <i>cZOGT1</i> ) CDS into pCold-I |
| 13   | 5'-AGGTACCATGGCGATTGGCTC-3'                         | Cloning of Os04g0556600 ( <i>cZOGT2</i> ) CDS into pCold-I |
| 14   | 5'-CGTCGACTCATCTTGTGATGTAGCCAACGAAGTCATCCAG-3'      | Cloning of Os04g0556600 ( <i>cZOGT2</i> ) CDS into pCold-I |
| 15   | 5'-CCATATGATGGCAGCGAAGGGAAAC-3'                     | Cloning of Os04g0565200 CDS into pCold-I                   |
| 16   | 5'-GGTCGACTCATCTTGTGATATGATC-3'                     | Cloning of Os04g0565200 CDS into pCold-I                   |
| 17   | 5'-CCATATGATGGCAGAGAAGGGGAAC-3'                     | Cloning of Os04g0565400 ( <i>cZOGT3</i> ) CDS into pCold-I |
| 18   | 5'-GGTCGACTCACCTTGTGATGTGAGC-3'                     | Cloning of Os04g0565400 ( <i>cZOGT3</i> ) CDS into pCold-I |
| 19   | 5'-GCTCGGTACCCTCGAGATGGAGACTCCGCCGCCGCTG-3'         | Cloning of Os07g0660500 CDS into pCold-I                   |
| 20   | 5'-ATTCGGATCCCTCGATCACCTCGTCAGGTAGGCGACGAGGTCGTC-3' | Cloning of Os07g0660500 CDS into pCold-I                   |
| 21   | 5'-ATTGAGGAGGCGATGCTGCCTGAGA-3'                     | Quantitative/semi-quantitative RT-PCR for <i>cZOGT1</i>    |
| 22   | 5'-GATGTAGCCAACGAAGTCATCCAAGC-3'                    | Quantitative/semi-quantitative RT-PCR for <i>cZOGT1</i>    |
| 23   | 5'-TCATCGAAGAGGCGATGCTGCCTGAGA-3'                   | Quantitative/semi-quantitative RT-PCR for <i>cZOGT2</i>    |
| 24   | 5'-GTGATGTAGCCAACGAAGTCATCCAGGT-3'                  | Quantitative/semi-quantitative RT-PCR for <i>cZOGT2</i>    |
| 25   | 5'-TTCCCCCTCCCACCTCATGCCCTCT-3'                     | Quantitative/semi-quantitative RT-PCR for <i>cZOGT3</i>    |
| 26   | 5'-TGGTGTGCGACACGACGACGACCCGA-3'                    | Quantitative/semi-quantitative RT-PCR for <i>cZOGT3</i>    |
| 27   | 5'-GGCTGGAATTGCTCTTAAC-3'                           | Quantitative/semi-quantitative RT-PCR for <i>Gpc1</i>      |
| 28   | 5'-CAGCATAGACAAAGCATACC-3'                          | Quantitative/semi-quantitative RT-PCR for <i>Gpc1</i>      |
| 29   | 5'-AAAAAGCAGGCTTCATCTTCAGACAATCAAGTGTATGAGGGG-3'    | Cloning of <i>cZOGT1</i> promoter into pDONR221            |
| 30   | 5'-AGAAAGCTGGGTGCGAGTGCTCTTGTCACTGGTTGCTTG-3'       | Cloning of <i>cZOGT1</i> promoter into pDONR221            |
| 31   | 5'-AAAAAGCAGGCTATCAGGGCGAAGCCAGGATTTGAGATTAG-3'     | Cloning of <i>cZOGT2</i> promoter into pDONR221            |
| 32   | 5'-AGAAAGCTGGGTTGAGCGCTTATGTCGTCAGTATATGG-3'        | Cloning of <i>cZOGT2</i> promoter into pDONR221            |
| 33   | 5'-AAAAAGCAGGCTATATCCTCGGCCTCCGTTTTCC-3'            | Cloning of <i>cZOGT3</i> promoter into pDONR221            |
| 34   | 5'-AGAAAGCTGGGTTCTCCGTGCCTCTCAATGCCTGAATG-3'        | Cloning of <i>cZOGT3</i> promoter into pDONR221            |
| 35   | 5'-GGGACAAGTTTGTACAAAAAGCAGGCT-3'                   | Adapter PCR for <i>attB1</i> site                          |
| 36   | 5'-GGGACCACCTTTGTACAAGAAAGCTGGGT-3'                 | Adapter PCR for <i>attB2</i> site                          |
| 37   | 5'-CCGGCGCGCAAGCTATCACAAAGTTGTACAAAAAGC-3'          | Insertion of a gateway cassette into pCAMBIA1390-GUS       |
| 38   | 5'-ACCTGCAGCAAGCTATCACCACTTTGTACAAGAAAGC-3'         | Insertion of a gateway cassette into pCAMBIA1390-GUS       |
| 39   | 5'-TTCTAGAATGGCGATTGGCAC-3'                         | Insertion of <i>cZOGT1</i> CDS into pACT-Nos/Hmz           |
| 40   | 5'-GGATATCTCATCTTGTGATGTAGCCAACG-3'                 | Insertion of <i>cZOGT1</i> CDS into pACT-Nos/Hmz           |
| 41   | 5'-TTCTAGAATGGCGATTGGCTC-3'                         | Insertion of <i>cZOGT2</i> CDS into pACT-Nos/Hmz           |
| 42   | 5'-GGATATCTCATCTTGTGATGTAGCCAACGAAGTCATCCAG-3'      | Insertion of <i>cZOGT2</i> CDS into pACT-Nos/Hmz           |
| 43   | 5'-TTCTAGAATGGCAGAGAAGGGGAAC-3'                     | Insertion of <i>cZOGT3</i> CDS into pACT-Nos/Hmz           |
| 44   | 5'-CCCCGGTCCACCTTGTGATGTGAGC-3'                     | Insertion of <i>cZOGT3</i> CDS into pACT-Nos/Hmz           |

CDS, coding sequence; Nos., numbers, RT-PCR, reverse transcription-PCR.
